# Supplementary material for: Immune-related adverse events of COVID-19 vaccination in skin cancer patients receiving immune-checkpoint inhibitor treatment
Source: Springer Nature journal article supplement (doi:10.1007/s00262-021-03133-w), 2021-12-23
Supplement: MOESM1 [file 19974550]

**Supplementary Table 1:** Characteristics of all cancer patients and of the patients who received COVID-19 vaccination and ICI treatment

|                                                         | <b>All patients (n=130) ICI + vac patients (n=89)</b> |                   |
|---------------------------------------------------------|-------------------------------------------------------|-------------------|
| <b>General information:</b>                             |                                                       |                   |
| Median age (range)                                      | 63 (21-88)                                            | 64 (31-88)        |
| Women                                                   | 51 (39%)                                              | 32 (36%)          |
| Men                                                     | 79 (61%)                                              | 57 (64%)          |
| Median BMI (range)                                      | 26 (17-43)                                            | 26 (19-34)        |
| Vaccinated patients                                     | 109 (84%)                                             | 89 (100%)         |
| Vaccination not wanted                                  | 20 (15%)                                              | n/a               |
| No vaccination because of coronavirus infection         | 1 (0.8%)                                              | n/a               |
| <b>Tumor type:</b>                                      |                                                       |                   |
| Melanoma                                                | 113 (87%)                                             | 79 (89%)          |
| Squamous cell carcinoma                                 | 8 (6%)                                                | 6 (7%)            |
| Merkel cell carcinoma                                   | 4 (3%)                                                | 4 (4%)            |
| Basal cell Carcinoma                                    | 1 (1%)                                                | 0 (0%)            |
| Angiosarcoma                                            | 2 (1.5%)                                              | 0 (0%)            |
| Lymphoma                                                | 2 (1.5%)                                              | 0 (0%)            |
| <b>Anti-cancer therapy:</b>                             |                                                       |                   |
| PD-1 antibody                                           | 79 (61%)                                              | 63 (71%)          |
| PD-L1 antibody                                          | 6 (5%)                                                | 6 (7%)            |
| CTLA4 + PD-1 antibody                                   | 24 (18%)                                              | 20 (22%)          |
| CD-30 antibody                                          | 1 (1%)                                                | n/a               |
| Targeted therapy                                        | 6 (5%)                                                | n/a               |
| Chemotherapy                                            | 5 (4%)                                                | n/a               |
| Bispecific fusion protein                               | 8 (6%)                                                | n/a               |
| Vaccination                                             | 1 (1%)                                                | n/a               |
| <b>Type of vaccine received by vaccinated patients:</b> |                                                       |                   |
| BioNTech                                                | 94 (86%)                                              | 76 (86%)          |
| Moderna                                                 | 3 (3%)                                                | 2 (2%)            |
| AstraZeneca                                             | 8 (7%)                                                | 8 (9%)            |
| AstraZeneca + BioNTech                                  | 2 (2%)                                                | 2 (2%)            |
| Johnson & Johnson                                       | 2 (2%)                                                | 1 (1%)            |
| <b>Follow-up time after vaccination:</b>                |                                                       |                   |
| Median FU after first vaccination (range)               | 125 days (49-215)                                     | 125 days (69-215) |
| Median FU after second vaccination (range)              | 84 days (31-188)                                      | 84 days (34-188)  |

Abbreviations: BMI, body mass index. FU, follow-up. ICI, immune checkpoint inhibitors. n/a, not applicable. vac, vaccinated.
