# Supplementary material for: Immune-related adverse events of COVID-19 vaccination in skin cancer patients receiving immune-checkpoint inhibitor treatment
Source: Springer Nature journal article supplement (doi:10.1007/s00262-021-03133-w), 2021-12-23
Supplement: MOESM2 [file 19974550]

**Supplementary Table 2:** General side effects reported by all metastatic skin cancer patients and by ICI patients after first and second vaccination, with duration of symptoms given in days

| Symptoms                  | All patients               |                                       |                            |                                       | ICI patients              |                                       |                           |                                       |
|---------------------------|----------------------------|---------------------------------------|----------------------------|---------------------------------------|---------------------------|---------------------------------------|---------------------------|---------------------------------------|
|                           | 1st vaccination<br>(n=109) | Median<br>duration in<br>days (range) | 2nd vaccination<br>(n=102) | Median<br>duration in<br>days (range) | 1st vaccination<br>(n=89) | Median<br>duration in<br>days (range) | 2nd vaccination<br>(n=85) | Median<br>duration in<br>days (range) |
| Pain at injection site    | 44 (40%)                   | 1 (1-7)                               | 38 (37%)                   | 1 (1-7)                               | 36 (40%)                  | 1 (1-7)                               | 32 (38%)                  | 1 (1-7)                               |
| Redness at injection site | 7 (6%)                     | 2 (1-4)                               | 4 (4%)                     | 3 (1-7)                               | 6 (7%)                    | 2 (1-4)                               | 4 (5%)                    | 3 (1-7)                               |
| Fatigue                   | 23 (21%)                   | 1 (1-10)                              | 33 (32%)                   | 2 (1-7)                               | 21 (24%)                  | 1 (1-10)                              | 32 (38%)                  | 2 (1-7)                               |
| Feeling of weakness       | 5 (6%)                     | 5 (2-10)                              | 13 (13%)                   | 2 (1-7)                               | 5 (6%)                    | 5 (2-10)                              | 13 (15%)                  | 2 (1-7)                               |
| Malaise                   | 2 (2%)                     | 2 (1-3)                               | 10 (10%)                   | 1.5 (1-7)                             | 2 (2%)                    | 2 (1-3)                               | 9 (11%)                   | 2 (1-7)                               |
| Vomiting                  | 0 (0%)                     | n/a                                   | 3 (3%)                     | 1                                     | 0 (0%)                    | n/a                                   | 3 (4%)                    | 1                                     |
| Dizziness                 | 4 (4%)                     | 2.5 (1-10)                            | 5 (5%)                     | 2 (1-5)                               | 4 (4%)                    | 2.5 (1-10)                            | 5 (6%)                    | 2 (1-5)                               |
| Headache                  | 9 (8%)                     | 2 (1-7)                               | 15 (15%)                   | 1 (1-6)                               | 9 (10%)                   | 2 (1-7)                               | 15 (18%)                  | 1 (1-6)                               |
| Muscle pain               | 9 (8%)                     | 2 (1-7)                               | 11 (11%)                   | 1 (1-7)                               | 8 (9%)                    | 2 (1-7)                               | 10 (12%)                  | 1.5 (1-7)                             |
| Joint pain                | 5 (5%)                     | 5 (2-7)                               | 10 (10%)                   | 1.5 (1-7)                             | 5 (6%)                    | 5 (2-7)                               | 10 (12%)                  | 2 (1-7)                               |
| Fever                     | 6 (7%)                     | 1.5 (1-7)                             | 11 (11%)                   | 1 (1-7)                               | 6 (7%)                    | 1.5 (1-7)                             | 10 (12%)                  | 1.5 (1-7)                             |
| Chills                    | 4 (4%)                     | 1 (1-7)                               | 7 (7%)                     | 1 (1-3)                               | 6 (7%)                    | 1.5 (1-7)                             | 6 (7%)                    | 1.5 (1-3)                             |
| Flu-like symptoms         | 3 (3%)                     | 4 (1-7)                               | 4 (4%)                     | 2 (2-5)                               | 3 (3%)                    | 4 (1-7)                               | 4 (5%)                    | 2 (2-5)                               |
| Lymph node swelling       | 1 (1%)                     | 7                                     | 2 (2%)                     | 4.5 (2-7)                             | 1 (1%)                    | 7                                     | 1 (1%)                    | 7                                     |
| Heart racing              | 0 (0%)                     | n/a                                   | 1 (1%)                     | 5                                     | 0 (0%)                    | n/a                                   | 1 (1%)                    | 5                                     |
| Rash                      | 0 (0%)                     | n/a                                   | 0 (0%)                     | n/a                                   | 0 (0%)                    | n/a                                   | 0 (0%)                    | n/a                                   |
| Seizure                   | 0 (0%)                     | n/a                                   | 0 (0%)                     | n/a                                   | 0 (0%)                    | n/a                                   | 0 (0%)                    | n/a                                   |
| Allergic reactions        | 0 (0%)                     | n/a                                   | 0 (0%)                     | n/a                                   | 0 (0%)                    | n/a                                   | 0 (0%)                    | n/a                                   |

Abbreviations: ICI, immune checkpoint inhibitors. n/a, not applicable.
